# Supplementary material for: Epidemiology and Genotype Distribution of Hepatitis C Virus In Russia
Source: Preprints.org preprint supplement (doi:10.20944/preprints202211.0057.v1), 2022-11-02
Supplement: Supplementary file 1 [file supplementary]

**Table S1. Prevalence of HCV genotypes in males and females.**

| Genotype | Sex total value (percentage %) | |
| --- | --- | --- |
| Male | Female |
| G1 | 2701 (49) | 2394 (58) |
| G2 | 331 (6) | 371 (9) |
| G3 | 2480 (45) | 1362 (33) |
